# Supplementary material
Source: Springer Nature journal article supplement (https://www.springermedizin.de/resource/supplementary/12936_2013_2921_MOESM4_ESM.pdf/9544594)

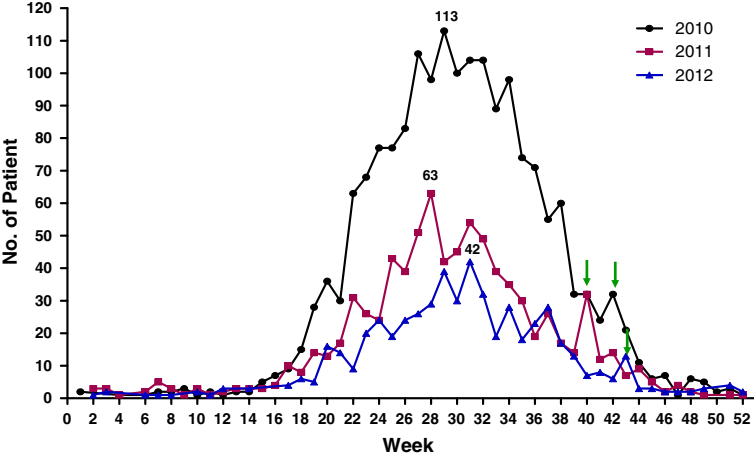

Supplement: MOESM4 [file 9544594]
